# Supplementary material for: Single-molecule force spectroscopy of protein-membrane interactions
Source: eLife journal article supplement (doi:10.7554/elife.30493), 2017-10-30
Supplement: supp [file elife-30493-supp-v1.zip]

Archive with 13 entries (13 files):
- elife_poa_e30493_Figure_1_figure_supplement_4.pdf
- elife_poa_e30493_Figure_3_figure_supplement_1.pdf
- elife_poa_e30493_Figure_5_figure_supplement_5.pdf
- elife_poa_e30493_Figure_1_figure_supplement_5.pdf
- elife_poa_e30493_Figure1_figure_supplement_2.pdf
- elife_poa_e30493_Figure_1_figure_supplement_7.pdf
- elife_poa_e30493_Figure_4_figure_supplement_2.pdf
- elife_poa_e30493_Figure_4_figure_supplement_1.pdf
- elife_poa_e30493_Figure_4_figure_supplement_3.pdf
- elife_poa_e30493_Figure_1_figure_supplement_6.pdf
- elife_poa_e30493_Figure_1_figure_supplement_1.pdf
- elife_poa_e30493_Figure_1_figure_supplement_3.pdf
- elife_poa_e30493_Transparent_Reporting_File.docx
