# Supplementary figures and images for: Single-molecule force spectroscopy of protein-membrane interactions
Source: eLife journal article supplement (doi:10.7554/elife.30493), 2017-10-30

Figure 1-figure supplement 5

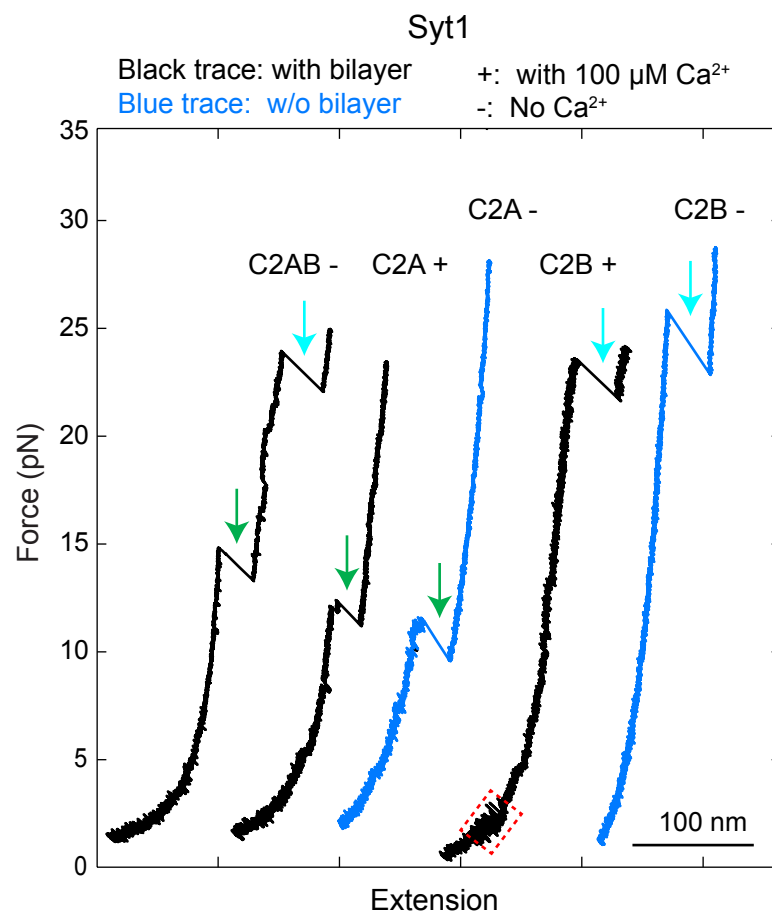

Supplement: supp [file elife-30493-supp-v1.zip]

Figure 1-figure supplement 3

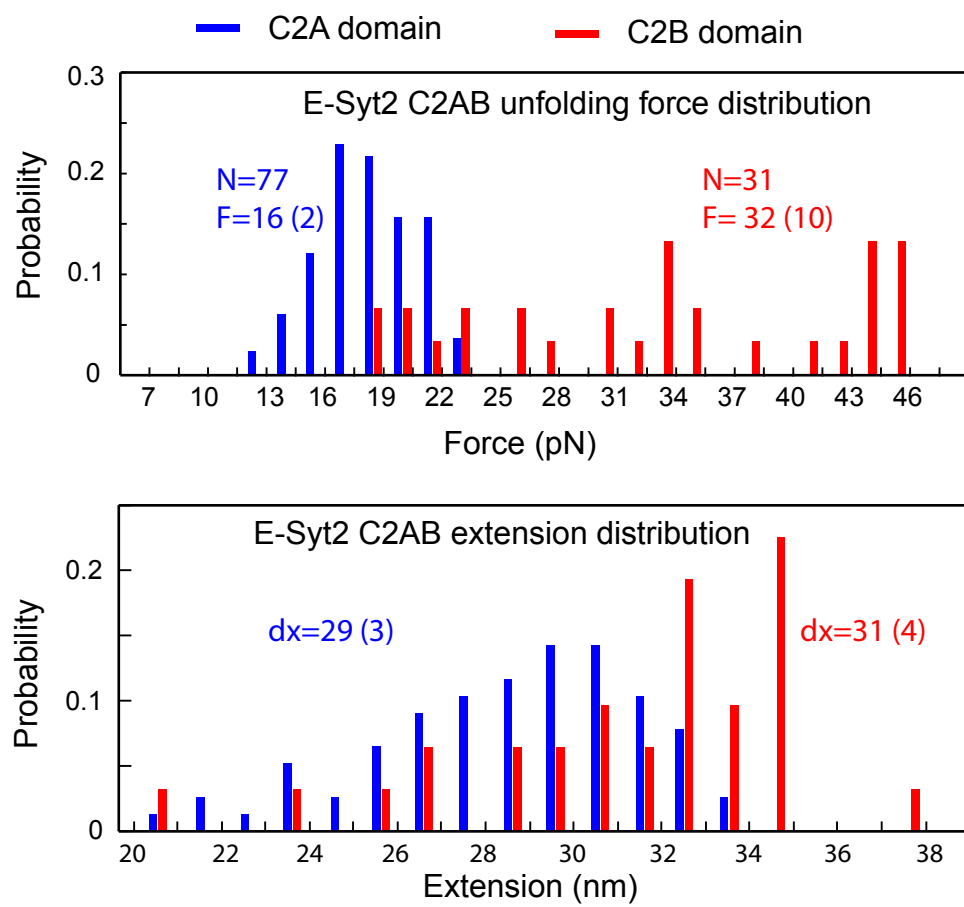

Supplement: supp [file elife-30493-supp-v1.zip]

Figure 4-figure supplement 2

Syt1 C2AB

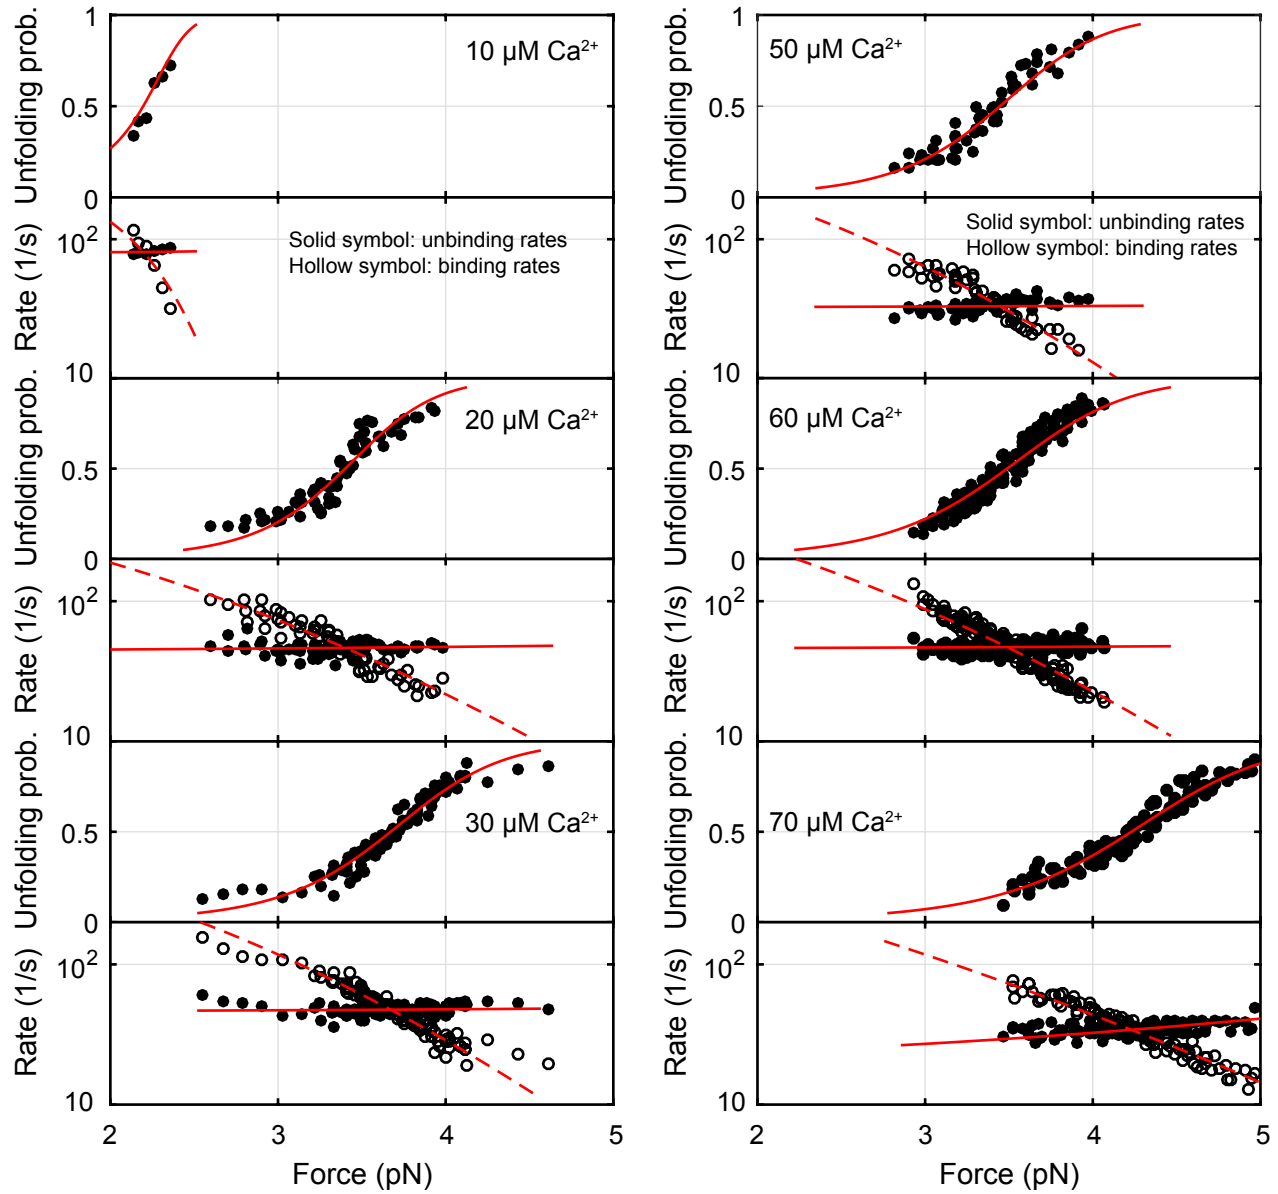

Supplement: supp [file elife-30493-supp-v1.zip]

Figure 1- figure supplement 7

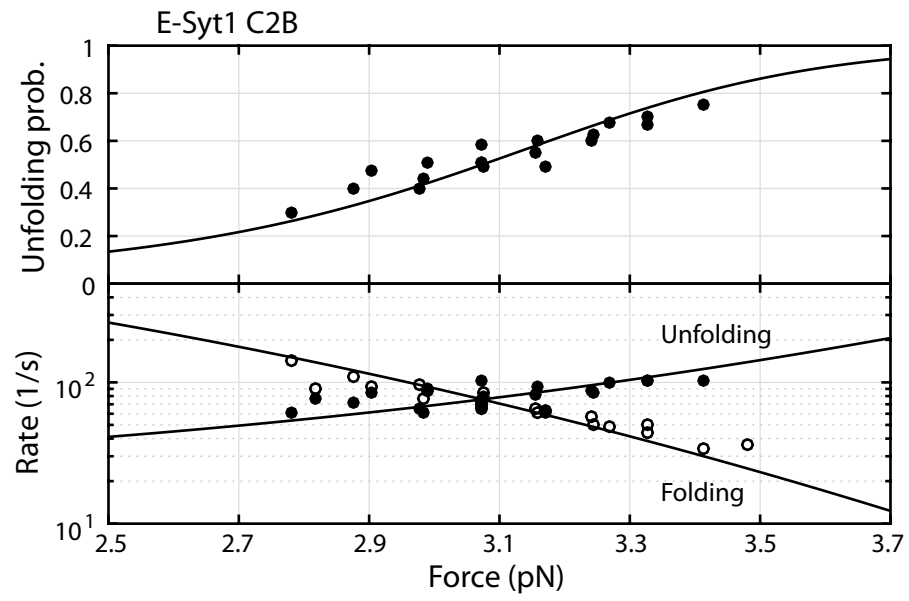

Supplement: supp [file elife-30493-supp-v1.zip]

Figure 1-figure supplement 4

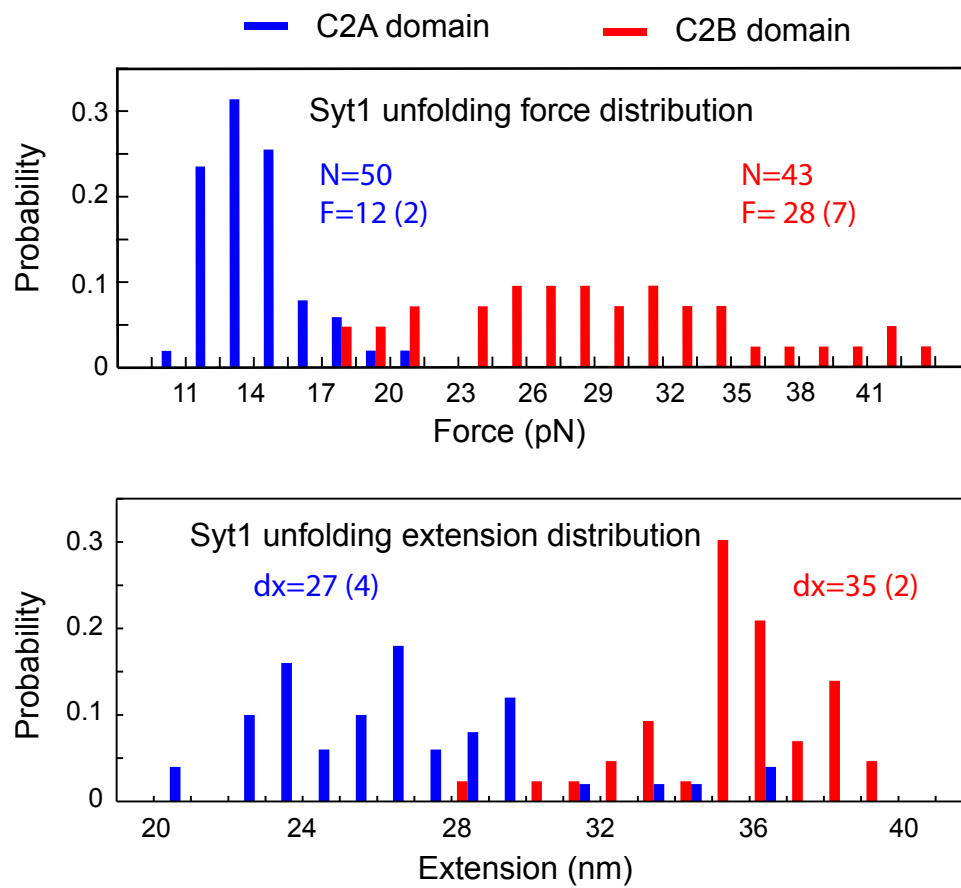

Supplement: supp [file elife-30493-supp-v1.zip › elife_poa_e30493_Figure_1_figure_supplement_4.pdf]

Figure 3-figure supplement 1

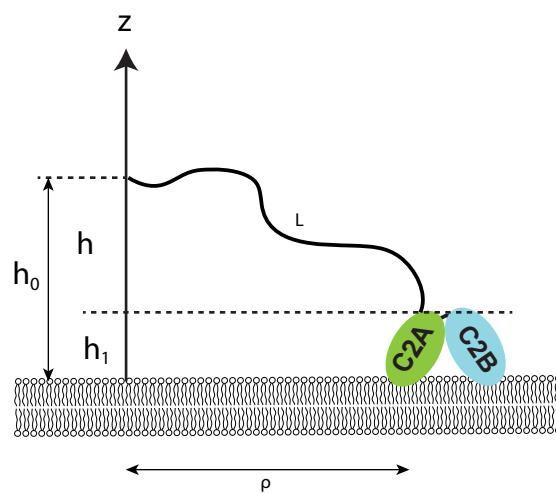

Supplement: supp [file elife-30493-supp-v1.zip › elife_poa_e30493_Figure_3_figure_supplement_1.pdf]

Figure 5-figure supplement 1

Syt1 C2AB

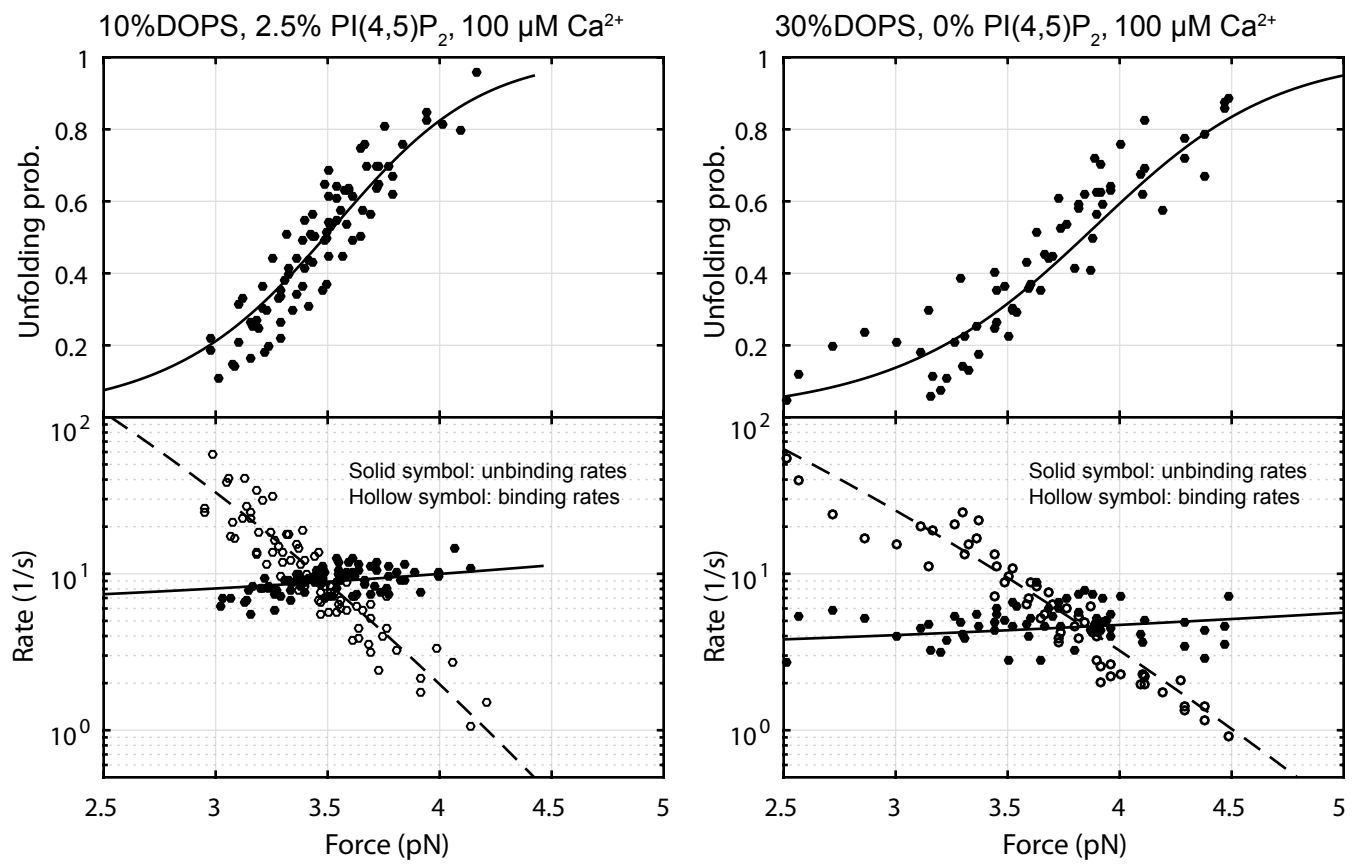

Supplement: supp [file elife-30493-supp-v1.zip › elife_poa_e30493_Figure_5_figure_supplement_5.pdf]

Figure 1-figure supplement 2

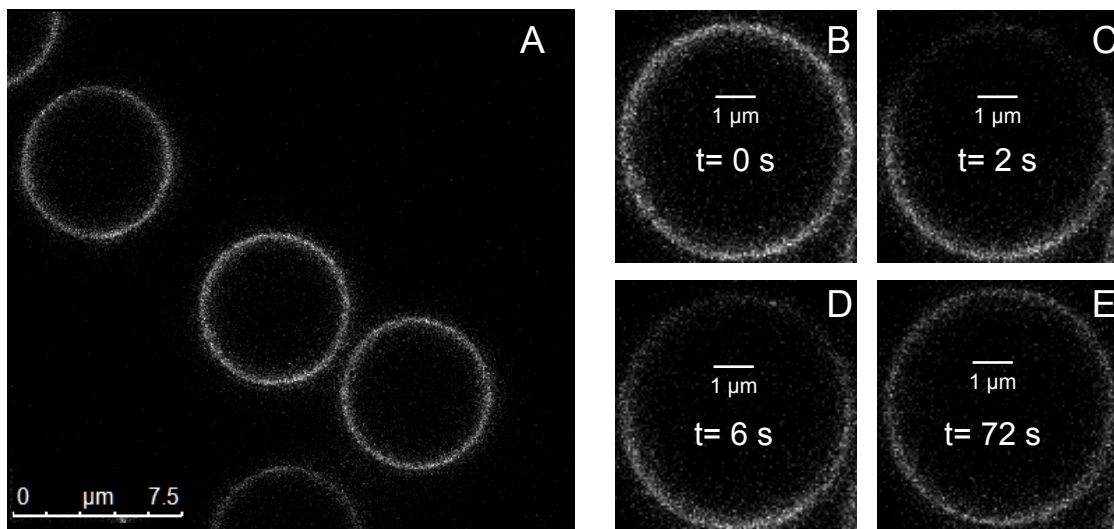

Supplement: supp [file elife-30493-supp-v1.zip › elife_poa_e30493_Figure1_figure_supplement_2.pdf]

Figure 4-figure supplement 1

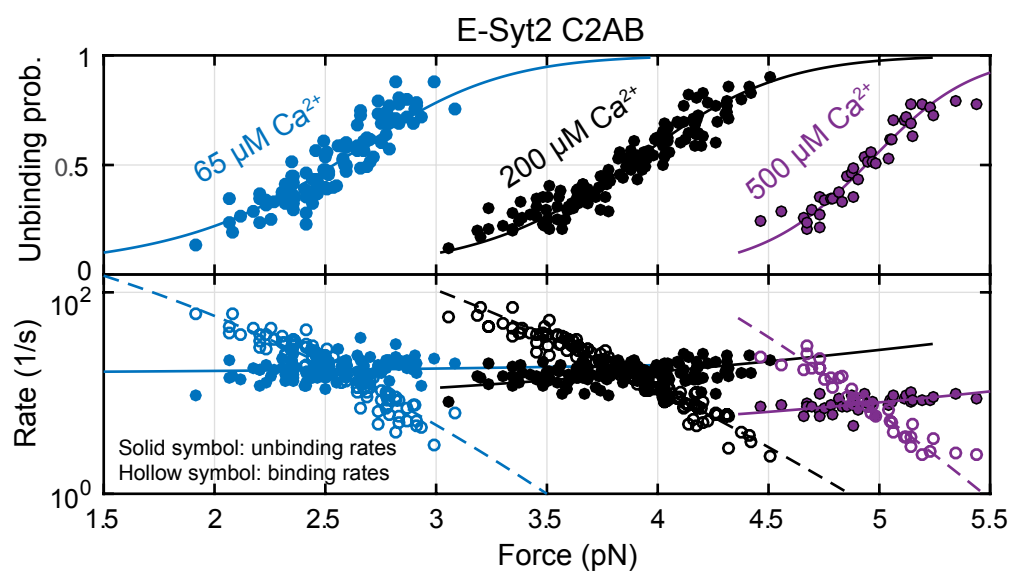

Supplement: supp [file elife-30493-supp-v1.zip › elife_poa_e30493_Figure_4_figure_supplement_1.pdf]

Figure 4-figure supplement 3

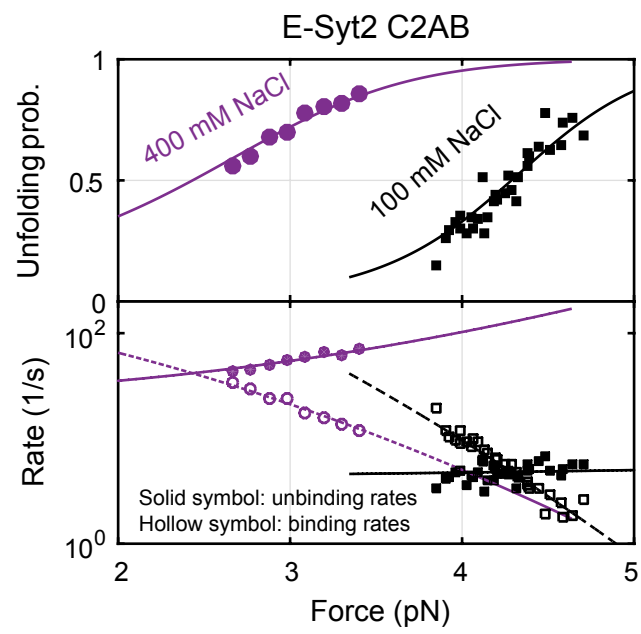

Supplement: supp [file elife-30493-supp-v1.zip › elife_poa_e30493_Figure_4_figure_supplement_3.pdf]

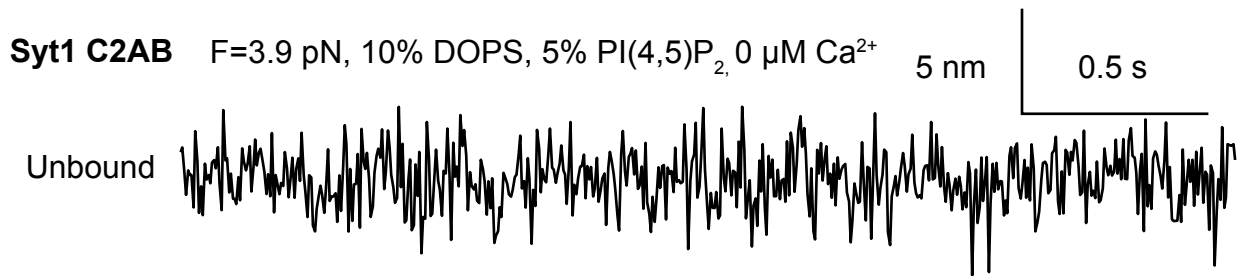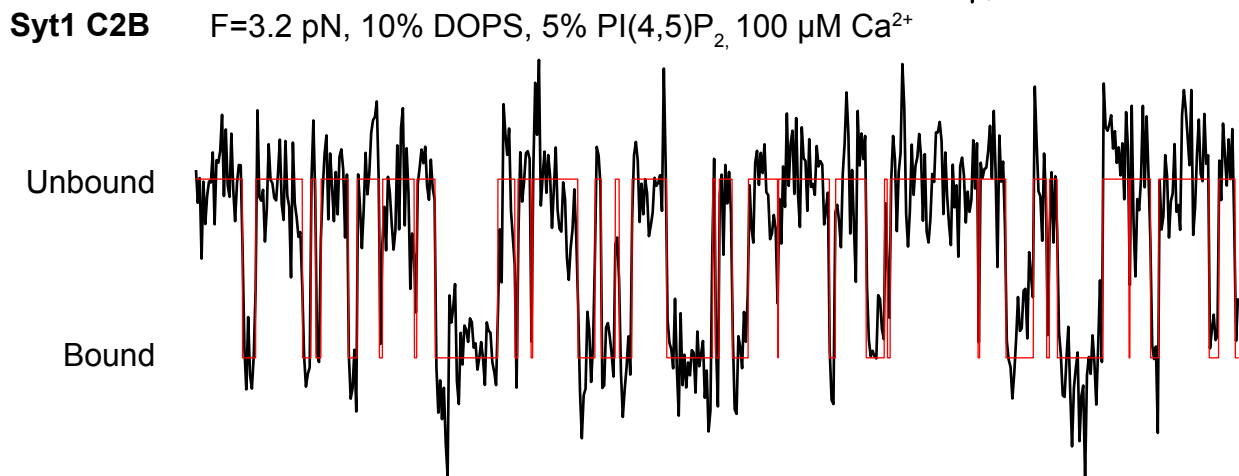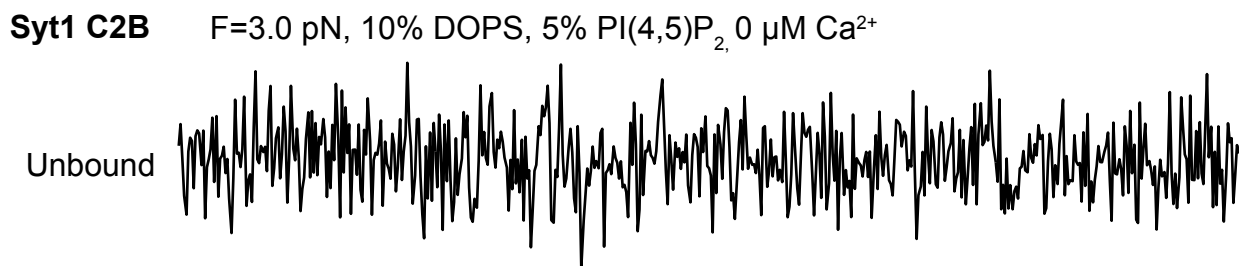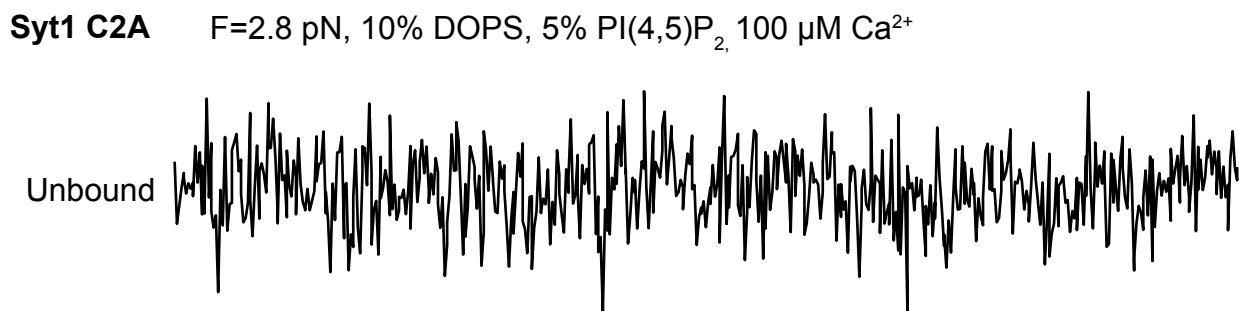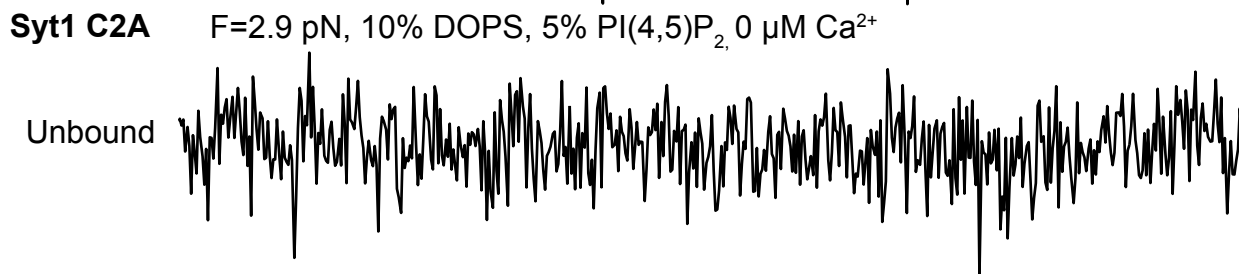

Supplement: supp [file elife-30493-supp-v1.zip › elife_poa_e30493_Figure_1_figure_supplement_6.pdf]

**Figure 1-figure supplement 1**

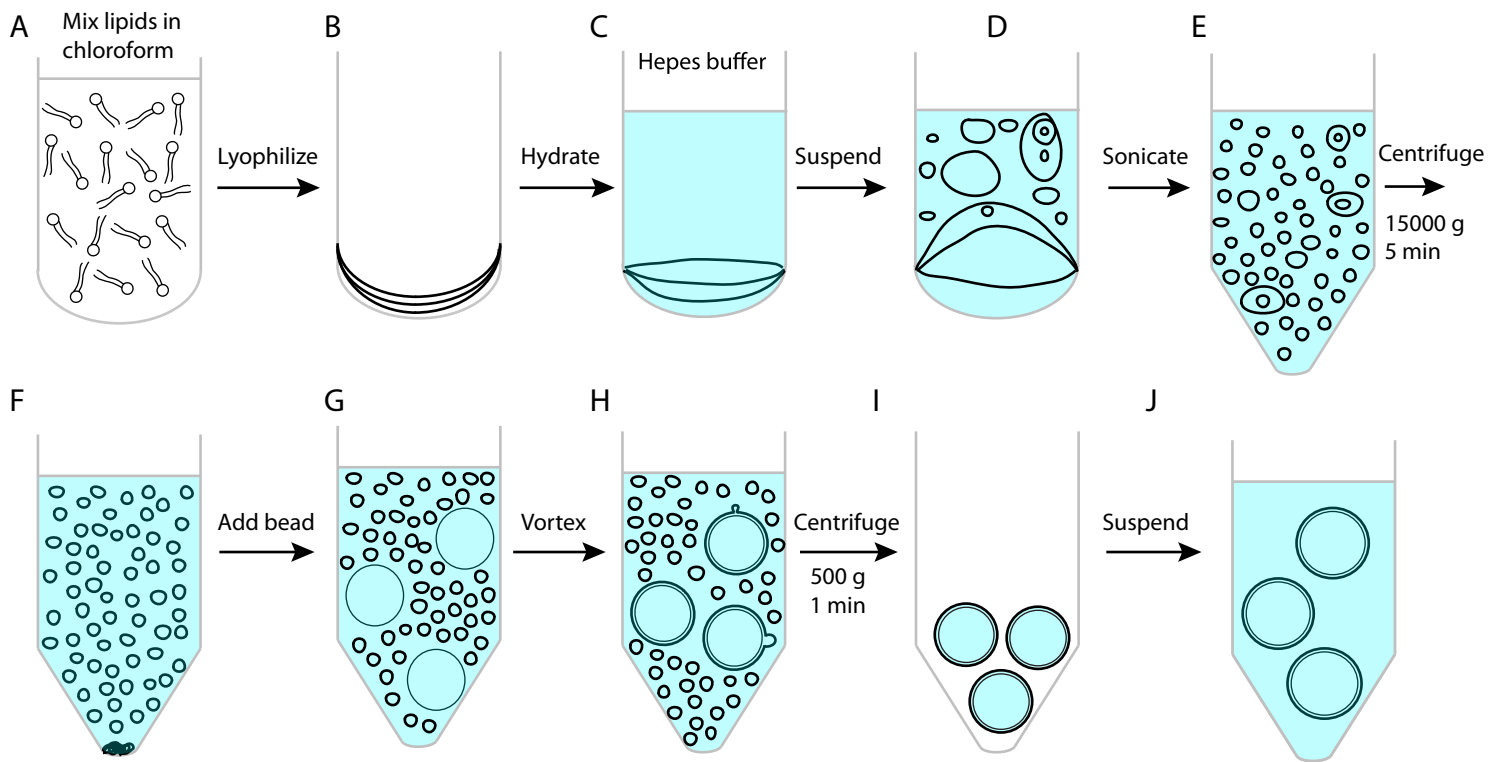

Supplement: supp [file elife-30493-supp-v1.zip › elife_poa_e30493_Figure_1_figure_supplement_1.pdf]
